# Supplementary material
Source: Elsevier journal article supplement (https://www.sciencedirect.com/science/article/pii/S1413867020301689)
Supplement: mmc1 [file S1413867020301689:mmc1.doc]

**References**

1.Nucci M, Queiroz-Telles F, Alvarado-Matute T, Tiraboschi IN, Cortes J, Zurita J, et al. Epidemiology of candidemia in Latin America: a laboratory-based survey. PLoS One. 2013;8(3):e59373. Epub 2013/03/26. doi: 10.1371/journal.pone.0059373. PubMed PMID: 23527176; PubMed Central PMCID: PMCPMC3601956.

2.Colombo AL, Nucci M, Park BJ, Nouer SA, Arthington-Skaggs B, da Matta DA, et al. Epidemiology of candidemia in Brazil: a nationwide sentinel surveillance of candidemia in eleven medical centers. J Clin Microbiol. 2006;44(8):2816-23. Epub 2006/08/08. doi: 10.1128/JCM.00773-06. PubMed PMID: 16891497; PubMed Central PMCID: PMCPMC1594610.

3.Colombo AL, Guimaraes T, Silva LR, de Almeida Monfardini LP, Cunha AK, Rady P, et al. Prospective observational study of candidemia in Sao Paulo, Brazil: incidence rate, epidemiology, and predictors of mortality. Infect Control Hosp Epidemiol. 2007;28(5):570-6. Epub 2007/04/28. doi: 10.1086/513615. PubMed PMID: 17464917.

4. Girao E, Levin AS, Basso M, Gobara S, Gomes LB, Medeiros EA, et al. Seven-year trend analysis of nosocomial candidemia and antifungal (fluconazole and caspofungin) use in Intensive Care Units at a Brazilian University Hospital. Med Mycol. 2008;46(6):581-8. Epub 2009/01/31. doi: 10.1080/13693780802004996. PubMed PMID: 19180727.

5. Colombo AL, Guimaraes T, Sukienik T, Pasqualotto AC, Andreotti R, Queiroz-Telles F, et al. Prognostic factors and historical trends in the epidemiology of candidemia in critically ill patients: an analysis of five multicenter studies sequentially conducted over a 9-year period. Intensive Care Med. 2014;40(10):1489-98. Epub 2014/08/02. doi: 10.1007/s00134-014-3400-y. PubMed PMID: 25082359; PubMed Central PMCID: PMCPMC4176831.

6. Motta AL, Almeida GM, Almeida Junior JN, Burattini MN, Rossi F. Candidemia epidemiology and susceptibility profile in the largest Brazilian teaching hospital complex. Braz J Infect Dis. 2010;14(5):441-8. Epub 2011/01/12. PubMed PMID: 21221471.

7. Moretti ML, Trabasso P, Lyra L, Fagnani R, Resende MR, de Oliveira Cardoso LG, et al. Is the incidence of candidemia caused by Candida glabrata increasing in Brazil? Five-year surveillance of Candida bloodstream infection in a university reference hospital in southeast Brazil. Med Mycol. 2013;51(3):225-30. Epub 2012/08/28. doi: 10.3109/13693786.2012.708107. PubMed PMID: 22920712.

8. da Matta DA, Souza ACR, Colombo AL. Revisiting Species Distribution and Antifungal Susceptibility of Candida Bloodstream Isolates from Latin American Medical Centers. J Fungi (Basel). 2017;3(2). Epub 2018/01/27. doi: 10.3390/jof3020024. PubMed PMID: 29371542; PubMed Central PMCID: PMCPMC5715916.

9. Colombo AL, Guimaraes T, Camargo LF, Richtmann R, Queiroz-Telles F, Salles MJ, et al. Brazilian guidelines for the management of candidiasis - a joint meeting report of three medical societies: Sociedade Brasileira de Infectologia, Sociedade Paulista de Infectologia and Sociedade Brasileira de Medicina Tropical. Braz J Infect Dis. 2013;17(3):283-312. Epub 2013/05/23. doi: 10.1016/j.bjid.2013.02.001. PubMed PMID: 23693017.

10. Sakita KM, Faria DR, Silva EMD, Tobaldini-Valerio FK, Kioshima ES, Svidzinski TIE, et al. Healthcare workers' hands as a vehicle for the transmission of virulent strains of Candida spp.: A virulence factor approach. Microb Pathog. 2017;113:225-32. Epub 2017/10/28. doi: 10.1016/j.micpath.2017.10.044. PubMed PMID: 29074432.

11. Okumura LM, Riveros BS, Gomes-da-Silva MM, Veroneze I. A cost-effectiveness analysis of two different antimicrobial stewardship programs. Braz J Infect Dis. 2016;20(3):255-61. Epub 2016/04/21. doi: 10.1016/j.bjid.2016.02.005. PubMed PMID: 27094234.

12. Bertollo LG, Lutkemeyer DS, Levin AS. Are antimicrobial stewardship programs effective strategies for preventing antibiotic resistance? A systematic review. Am J Infect Control. 2018;46(7):824-36. Epub 2018/02/24. doi: 10.1016/j.ajic.2018.01.002. PubMed PMID: 29472107.

13. Zuza-Alves DL, de Medeiros SS, de Souza LB, Silva-Rocha WP, Francisco EC, de Araujo MC, et al. Evaluation of Virulence Factors In vitro, Resistance to Osmotic Stress and Antifungal Susceptibility of Candida tropicalis Isolated from the Coastal Environment of Northeast Brazil. Front Microbiol. 2016;7:1783. Epub 2016/11/30. doi: 10.3389/fmicb.2016.01783. PubMed PMID: 27895625; PubMed Central PMCID: PMCPMC5108815.

14.Santos C, Lima N, Sampaio P, Pais C. Matrix-assisted laser desorption/ionization time-of-flight intact cell mass spectrometry to detect emerging pathogenic Candida species. Diagn Microbiol Infect Dis. 2011;71(3):304-8. Epub 2011/08/23. doi: 10.1016/j.diagmicrobio.2011.07.002. PubMed PMID: 21855250.

15. Merseguel KB, Nishikaku AS, Rodrigues AM, Padovan AC, e Ferreira RC, de Azevedo Melo AS, et al. Genetic diversity of medically important and emerging Candida species causing invasive infection. BMC Infect Dis. 2015;15:57. Epub 2015/04/19. doi: 10.1186/s12879-015-0793-3. PubMed PMID: 25887032; PubMed Central PMCID: PMCPMC4339437.

16.CLSI Performance standards for antifungal susceptibility testing of yeast. 1st edition. CLSI Supplement M60. Wayne, PA: Clinical and Laboratory Standards Institute; 2017.

17. CLSI. Reference Method for Broth Dilution Antifungal Susceptibility Testing of Yeasts. Fourth Informational Supplement. CLSI document M27-S4. 4th edition, Wayne, PA: Clinical and Laboratory Standards Institute; 2017.

18. Nguyen MH, Clancy CJ, Yu VL, Yu YC, Morris AJ, Snydman DR, et al. Do in vitro susceptibility data predict the microbiologic response to amphotericin B? Results of a prospective study of patients with Candida fungemia. J Infect Dis. 1998;177(2):425-30. Epub 1998/02/18. doi: 10.1086/514193. PubMed PMID: 9466531.

19. Braga PR, Cruz IL, Ortiz I, Barreiros G, Nouer SA, Nucci M. Secular trends of candidemia at a Brazilian tertiary care teaching hospital. Braz J Infect Dis. 2018;22(4):273-7. Epub 2018/08/18. doi: 10.1016/j.bjid.2018.07.008. PubMed PMID: 30118654.

20.Franca JC, Ribeiro CE, Queiroz-Telles F. [Candidemia in a Brazilian tertiary care hospital: incidence, frequency of different species, risk factors and antifungal susceptibility]. Rev Soc Bras Med Trop. 2008;41(1):23-8. Epub 2008/03/28. doi: 10.1590/s0037-86822008000100005. PubMed PMID: 18368266.

21.Pappas, P. G., Kauffman, C. A., Andes, D. R., Clancy, C. J., Marr, K. A., Ostrosky-Zeichner, L., … Sobel, J. D. (2015). Clinical Practice Guideline for the Management of Candidiasis: 2016 Update by the Infectious Diseases Society of America. Clinical Infectious Diseases, civ933. doi:10.1093/cid/civ933.

22.Blyth, C. C., Chen, S. C. A., Slavin, M. A., Serena, C., Nguyen, Q., … Marriott, D. (2009). Not Just Little Adults: Candidemia Epidemiology, Molecular Characterization, and Antifungal Susceptibility in Neonatal and Pediatric Patients. Pediatrics, 123(5), 1360–1368. doi:10.1542/peds.2008-2055.

23.Pinhati HM, Casulari LA, Souza AC, Siqueira RA, Damasceno CM, Colombo AL. Outbreak of candidemia caused by fluconazole resistant Candida parapsilosis strains in an intensive care unit. BMC Infect Dis. 2016;16(1):433. Epub 2016/08/22. doi: 10.1186/s12879-016-1767-9. PubMed PMID: 27544427; PubMed Central PMCID: PMCPMC4992558.

24. Miranda L, Rodrigues EC, Costa SF, van der Heijden IM, Dantas KC, Lobo RD, et al. Candida parapsilosis candidaemia in a neonatal unit over 7 years: a case series study. BMJ Open. 2012;2(4). Epub 2012/08/08. doi: 10.1136/bmjopen-2012-000992. PubMed PMID: 22869093; PubMed Central PMCID: PMCPMC3425904.

25.da Silva Ruiz L, Montelli AC, Sugizaki Mde F, Da Silva EG, De Batista GC, Moreira D, et al. Outbreak of fungemia caused by Candida parapsilosis in a neonatal intensive care unit: molecular investigation through microsatellite analysis. Rev Iberoam Micol. 2013;30(2):112-5. Epub 2012/11/14. doi: 10.1016/j.riam.2012.10.003. PubMed PMID: 23147512.

26. Ourives AP, Goncalves SS, Siqueira RA, Souza AC, Canziani ME, Manfredi SR, et al. High rate of Candida deep-seated infection in patients under chronic hemodialysis with extended central venous catheter use. Rev Iberoam Micol. 2016;33(2):100-3. Epub 2016/02/15. doi: 10.1016/j.riam.2015.10.002. PubMed PMID: 26874585.

27. Bergamasco MD, Garnica M, Colombo AL, Nucci M. Epidemiology of candidemia in patients with hematologic malignancies and solid tumours in Brazil. Mycoses. 2013;56(3):256-63. Epub 2012/10/10. doi: 10.1111/myc.12013. PubMed PMID: 23043234.

28.Nucci M, Colombo AL. Candidemia due to Candida tropicalis: clinical, epidemiologic, and microbiologic characteristics of 188 episodes occurring in tertiary care hospitals. Diagn Microbiol Infect Dis. 2007;58(1):77-82. Epub 2007/03/21. doi: 10.1016/j.diagmicrobio.2006.11.009. PubMed PMID: 17368800.

29.Kontoyiannis DP, Vaziri I, Hanna HA, Boktour M, Thornby J, Hachem R, et al. Risk Factors for Candida tropicalis fungemia in patients with cancer. Clin Infect Dis. 2001;33(10):1676-81. Epub 2001/09/25. doi: 10.1086/323812. PubMed PMID: 11568858.

30.Santos ER, Dal Forno CF, Hernandez MG, Kubica TF, Venturini TP, Chassot F, et al. Susceptibility of Candida spp. isolated from blood cultures as evaluated using the M27-A3 and new M27-S4 approved breakpoints. Rev Inst Med Trop Sao Paulo. 2014;56(6):477-82. Epub 2014/10/30. doi: 10.1590/s0036-46652014000600004. PubMed PMID: 25351540; PubMed Central PMCID: PMCPMC4296866.

31.Menezes EA, Mendes LG, Cunha FA. [Antifungal resistance of Candida tropicalis isolated in the State of Ceara]. Rev Soc Bras Med Trop. 2009;42(3):354-5. Epub 2009/08/18. doi: 10.1590/s0037-86822009000300024. PubMed PMID: 19684991.

32. da Matta DA, de Almeida LP, Machado AM, Azevedo AC, Kusano EJ, Travassos NF, et al. Antifungal susceptibility of 1000 Candida bloodstream isolates to 5 antifungal drugs: results of a multicenter study conducted in Sao Paulo, Brazil, 1995-2003. Diagn Microbiol Infect Dis. 2007;57(4):399-404. Epub 2007/01/24. doi: 10.1016/j.diagmicrobio.2006.10.011. PubMed PMID: 17240110.

33. Colombo AL, Garnica M, Aranha Camargo LF, Da Cunha CA, Bandeira AC, Borghi D, et al. Candida glabrata: an emerging pathogen in Brazilian tertiary care hospitals. Med Mycol. 2013;51(1):38-44. Epub 2012/07/06. doi: 10.3109/13693786.2012.698024. PubMed PMID: 22762208.

34.Pfaller MA, Diekema DJ, Gibbs DL, Newell VA, Nagy E, Dobiasova S, et al. Candida krusei, a multidrug-resistant opportunistic fungal pathogen: geographic and temporal trends from the ARTEMIS DISK Antifungal Surveillance Program, 2001 to 2005. J Clin Microbiol. 2008;46(2):515-21. Epub 2007/12/14. doi: 10.1128/JCM.01915-07. PubMed PMID: 18077633; PubMed Central PMCID: PMCPMC2238087.

35.Silva CM, Carvalho-Parahym AM, Macedo DP, Lima-Neto RG, Francisco EC, Melo AS, et al. Neonatal Candidemia Caused by Candida haemulonii: Case Report and Review of Literature. Mycopathologia. 2015;180(1-2):69-73. Epub 2015/02/11. doi: 10.1007/s11046-015-9872-7. PubMed PMID: 25666389.

36.Muro MD, Motta Fde A, Burger M, Melo AS, Dalla-Costa LM. Echinocandin resistance in two Candida haemulonii isolates from pediatric patients. J Clin Microbiol. 2012;50(11):3783-5. Epub 2012/08/17. doi: 10.1128/JCM.01136-12. PubMed PMID: 22895037; PubMed Central PMCID: PMCPMC3486200.

37.Garnacho-Montero, J., Díaz-Martín, A., Cantón-Bulnes, L., Ramírez, P., Sierra, R., Arias-Verdú, D., … García-Garmendia, J. L. (2018). Initial Antifungal Strategy Reduces Mortality in Critically Ill Patients With Candidemia. Critical Care Medicine, 46(3), 384–393. doi:10.1097/ccm.0000000000002867.

38. Lausch, K. R., Søgaard, M., Rosenvinge, F. S., Johansen, H. K., Boysen, T., Røder, B. L., … Arendrup, M. C. (2018). Treatment of candidemia in a nationwide setting: increased survival with primary echinocandin treatment. Infection and Drug Resistance, Volume 11, 2449–2459. doi:10.2147/idr.s176384.

39. Pasqualotto AC, Zimerman RA, Alves SH, Aquino VR, Branco D, Wiltgen D, et al. Take control over your fluconazole prescriptions: the growing importance of Candida glabrata as an agent of candidemia in Brazil. Infect Control Hosp Epidemiol. 2008;29(9):898-9. Epub 2008/09/13. doi: 10.1086/590191. PubMed PMID: 18785850.

40.Doi AM, Pignatari AC, Edmond MB, Marra AR, Camargo LF, Siqueira RA, et al. Epidemiology and Microbiologic Characterization of Nosocomial Candidemia from a Brazilian National Surveillance Program. PLoS One. 2016;11(1):e0146909. Epub 2016/01/26. doi: 10.1371/journal.pone.0146909. PubMed PMID: 26808778; PubMed Central PMCID: PMCPMC4726651.

41.Pfaller MA, Diekema DJ, Turnidge JD, Castanheira M, Jones RN. Twenty Years of the SENTRY Antifungal Surveillance Program: Results for Candida Species From 1997-2016. Open Forum Infect Dis. 2019;6(Suppl 1):S79-S94. Epub 2019/03/22. doi: 10.1093/ofid/ofy358. PubMed PMID: 30895218; PubMed Central PMCID: PMCPMC6419901.

42. Bizerra FC, Jimenez-Ortigosa C, Souza AC, Breda GL, Queiroz-Telles F, Perlin DS, Colombo AL. Breakthrough candidemia due to multidrug-resistant Candida glabrata during prophylaxis with a low dose of micafungin. Antimicrob Agents Chemother. 2014;58(4):2438-40. doi: 10.1128/AAC.02189-13. Epub 2014 Jan 27. PMID: 24468776; PMCID: PMC4023795.

43. Koehler, P., Stecher, M., Cornely, O. A., Koehler, D., Vehreschild, M. J. G. T., Bohlius, J., … Vehreschild, J. J. (2019). Morbidity and mortality of candidaemia in Europe: an epidemiologic meta-analysis. Clinical Microbiology and Infection. doi:10.1016/j.cmi.2019.04.024.

44. Toda M, Williams SR, Berkow EL, et al. Population-Based Active Surveillance for Culture-Confirmed Candidemia — Four Sites, United States, 2012–2016. MMWR Surveill Summ 2019;68(No. SS-8):1–15. DOI: <http://dx.doi.org/10.15585/mmwr.ss6808a1>.

45. Andes DR, Safdar N, Baddley JW, Playford G, Reboli AC, Rex JH, et al. Impact of treatment strategy on outcomes in patients with candidemia and other forms of invasive candidiasis: a patient-level quantitative review of randomized trials. Clin Infect Dis. 2012;54(8):1110-22. Epub 2012/03/14. doi: 10.1093/cid/cis021. PubMed PMID: 22412055.

46.Walsh, T., Katragkou, A., Chen, T., Salvatore, C., & Roilides, E. (2019). Invasive Candidiasis in Infants and Children: Recent Advances in Epidemiology, Diagnosis, and Treatment. Journal of Fungi, 5(1), 11. doi:10.3390/jof5010011.

47. Emiroglu, M. (2011). Micafungin use in children. Expert Review of Anti-Infective Therapy, 9(9), 821–834. doi:10.1586/eri.11.91.

48. Roilides E, Carlesse F, Leister-Tebbe H, et al. A Prospective, Open-label Study to Assess the Safety, Tolerability and Efficacy of Anidulafungin in the Treatment of Invasive Candidiasis in Children 2 to <18 Years of Age. The Pediatric Infectious Disease Journal. 2019 Mar;38(3):275-279. DOI: 10.1097/inf.0000000000002237.

49. Roilides, E., Carlesse, F., Tawadrous, M., Leister-Tebbe, H., Conte, U., Raber, S., … Queiroz-Telles, F. (2020). Safety, Efficacy and Pharmacokinetics of Anidulafungin in Patients 1 Month to <2 Years of Age with Invasive Candidiasis, Including Candidemia. The Pediatric Infectious Disease Journal, 39(4), 305–309. doi:10.1097/inf.0000000000002568.
